# Supplementary material for: Simulated Heat Waves Affect Cell Fate and Fitness in the Social Amoeba Dictyostelium discoideum
Source: Springer Nature journal article supplement (doi:10.1007/s00248-025-02519-y), 2025-04-01
Supplement: MOESM1 [file 248_2025_2519_MOESM1_ESM.pdf]

## Supplementary Information

### Simulated heat waves affect cell fate and fitness in the social amoeba *Dictyostelium discoideum*

Sarena Banu, Katharina C. Wollenberg Valero, Francisco Rivero\*

\*Centre for Biomedicine, Hull York Medical School, University of Hull, Hull, United Kingdom,  
[Francisco.rivero@hyms.ac.uk](mailto:Francisco.rivero@hyms.ac.uk)

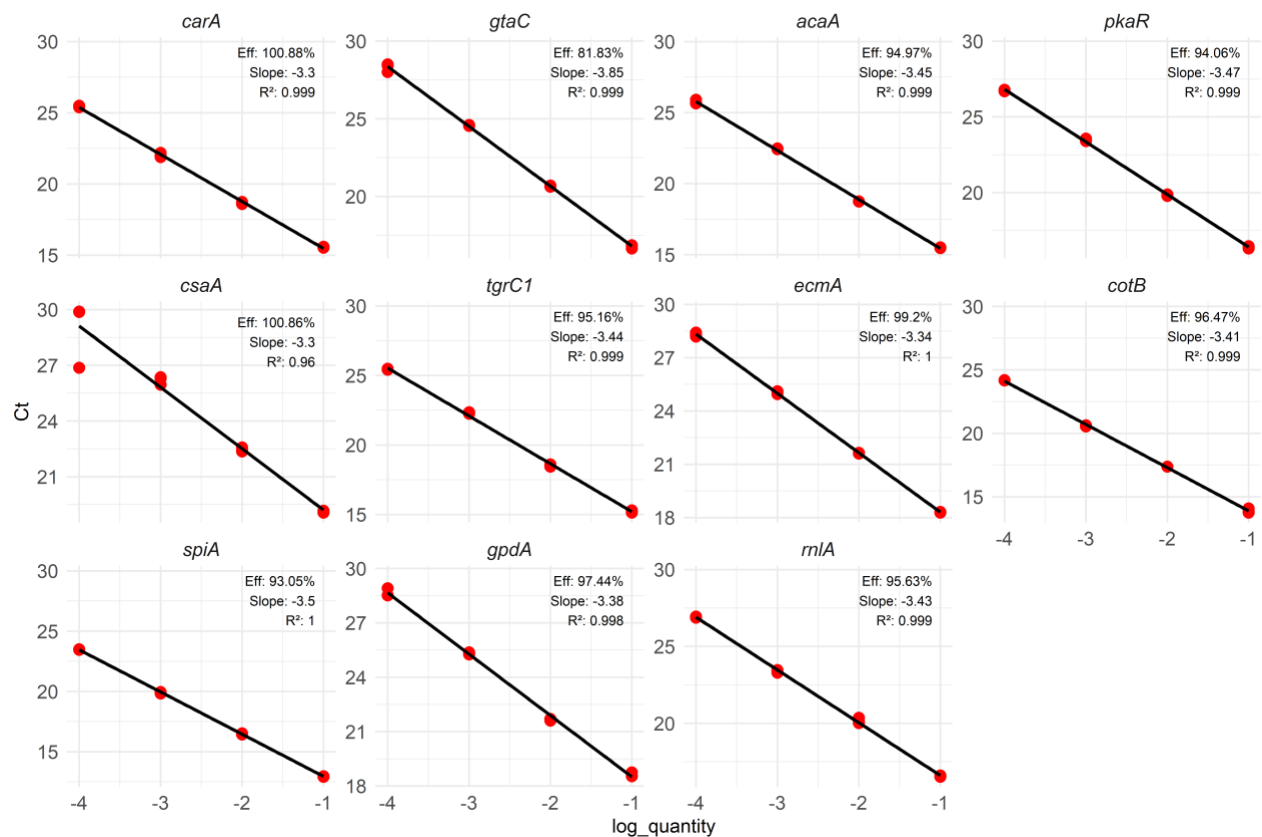

**Supplemental Figure 1.** Real-time qPCR standard curve analysis for *D. discoideum* developmental and reference genes. cDNA was diluted in a 10-fold series ( $10^{-1}$  to  $10^{-4}$ ) and the Ct values of three technical replicates per dilution determined. Gene-specific amplification efficiency and goodness of fit for each primer pair were calculated using a linear regression model.

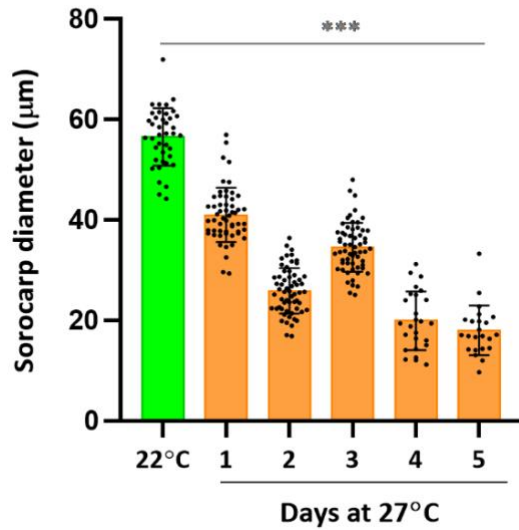

**Supplemental Figure 2.** Effect of heat stress duration on *D. discoideum* sorocarp size. The experiment was conducted as in Fig 4. Images were acquired with a ZEISS stereomicroscope at the end of experiment and used to measure sorocarp diameters. Data are presented as mean  $\pm$  SD of 23 - 60 sorocarps per condition from two independent experiments. \*\*\* $P < 0.001$  relative to 22°C. ANOVA followed by Tukey's test.

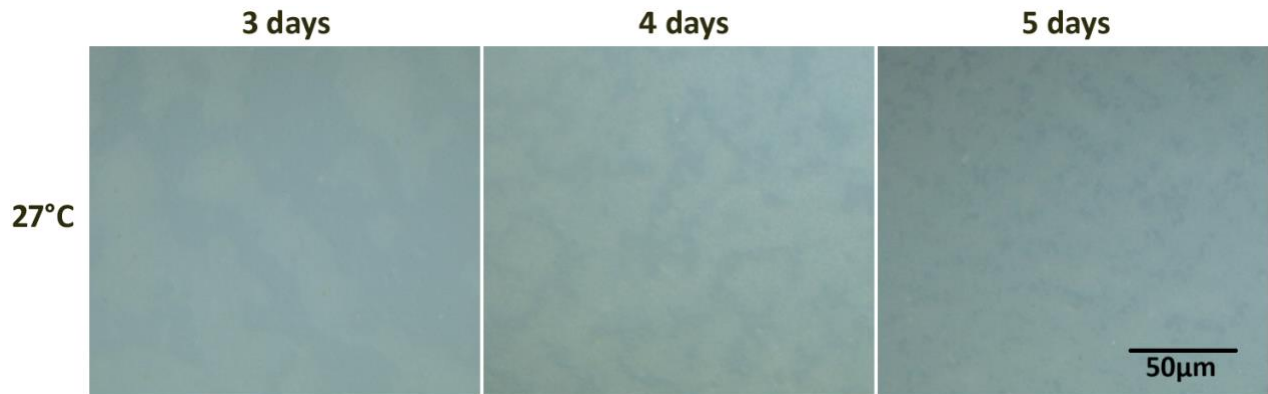

**Supplemental Figure 3.** Effect of heat stress duration on *D. discoideum* development. Vegetative cells were cultivated in suspension at 27°C, and samples were collected daily from 3 to 5 days. The cells were then allowed to develop on non-nutrient agar plates at 27°C. Images were captured after 30 hours using a ZEISS stereomicroscope.

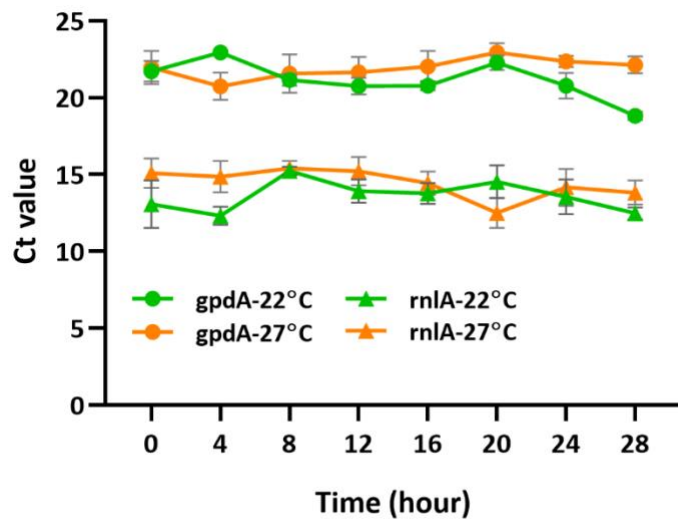

**Supplemental Figure 4.** Expression pattern of the reference genes *gpdA* and *rnlA* across the development cycle. Cells were grown at 22°C (green) or subjected to a simulated heatwave for 3 days at 27°C (orange) and allowed to develop on nitrocellulose filters at 22°C. Gene expression was determined by RT-qPCR. Data are mean  $\pm$  SD of 6 (*gpdA*) or 4 (*rnlA*) determinations.

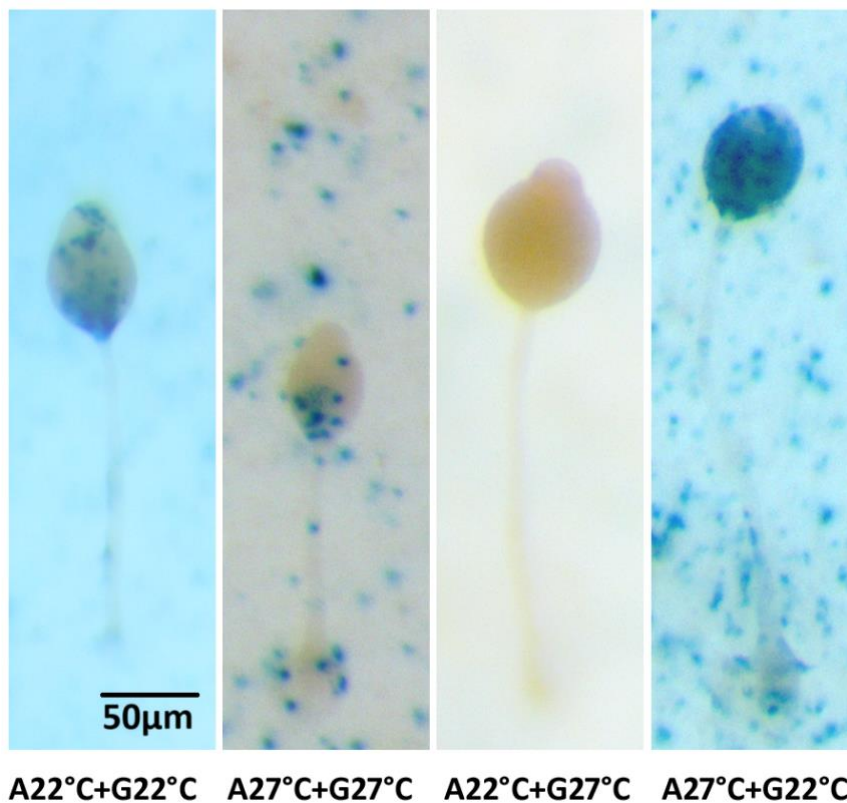

**Supplemental Figure 5.** Effects of a heatwave on cell fate during development using the A15-Gal reporter strain expressing the  $\beta$ -galactosidase gene under the control of the constitutive actin 15 promoter. AX2 (A) and A15-Gal (G) cells were grown at 22°C or 27°C for 3 days and then mixed in various combinations using a 5% proportion of reporter cells. The mixtures were allowed to develop synchronously on nitrocellulose filters at 22°C and processed as described in Figure 6A. Chimeric fruiting bodies are shown.

**Supplemental Table 1.** Statistical analysis of *D. discoideum* AX2 colony growth rate on agar with a *K. aerogenes* lawn at various temperatures (Figure 2C). Colony size was analyzed using a nonparametric generalized linear mixed model (GLMM) after determining that residuals were not normally distributed. A gamma GLMM with a log link function was applied. Random effects for replicate, plate number and colony number were included to control for nested dependencies within the experimental design. P values were calculated using a Tukey's multiple comparison test. ns, not significant; \*P<0.05; \*\*P<0.01; \*\*\*P < 0.001.

**Table 1a.** Random effects. Number of observations: 384. Groups: Replicate, 4; Plate number, 4; Colony number, 12. Dispersion estimate for gamma family (sigma<sup>2</sup>): 0.263

| Group         | Name      | Variance | Standard deviation |
|---------------|-----------|----------|--------------------|
| Replicate     | Intercept | 0.08693  | 0.29484            |
| Plate Number  | Intercept | 0.00895  | 0.094619           |
| Colony Number | Intercept | 0.000038 | 0.006163           |

**Table 1b.** Conditional model after accounting for random factors replicate, plate number and colony number.

| Predictor        | Estimate | Standard error | Z value | Summary | P value  |
|------------------|----------|----------------|---------|---------|----------|
| (Intercept)      | -0.199   | 0.175          | -1.136  | n       | 0.256    |
| Temperature 27°C | -0.386   | 0.0652         | -5.92   | ***     | 3.22E-09 |
| Temperature 30°C | -1.727   | 0.0648         | -26.655 | ***     | <2E-16   |
| Days             | 0.29     | 0.0242         | 11.968  | ***     | <2E-16   |

**Table 1c.** Post hoc test after accounting for random factors replicate, plate number and colony number.

| Tukey's multiple comparisons test | Mean diff. | 95.00% CI of diff.  | Summary | Adjusted P value |
|-----------------------------------|------------|---------------------|---------|------------------|
| D1:22°C vs. D1:27°C               | 0.1594     | -0.2687 to 0.5875   | ns      | 0.9868           |
| D1:22°C vs. D1:30°C               | 0.5545     | 0.1367 to 0.9723    | ***     | 0.001            |
| D1:22°C vs. D2:22°C               | -0.7515    | -1.169 to -0.3337   | ***     | <0.001           |
| D1:22°C vs. D2:27°C               | -0.2939    | -0.7221 to 0.1342   | ns      | 0.5085           |
| D1:22°C vs. D2:30°C               | 0.5394     | 0.1216 to 0.9572    | **      | 0.0016           |
| D1:22°C vs. D3:22°C               | -1.636     | -2.054 to -1.219    | ***     | <0.001           |
| D1:22°C vs. D3:27°C               | -0.7206    | -1.149 to -0.2925   | ***     | <0.001           |
| D1:22°C vs. D3:30°C               | 0.5303     | 0.1125 to 0.9481    | **      | 0.0022           |
| D1:22°C vs. D4:22°C               | -2.555     | -2.972 to -2.137    | ***     | <0.001           |
| D1:22°C vs. D4:27°C               | -1.221     | -1.649 to -0.7925   | ***     | <0.001           |
| D1:22°C vs. D4:30°C               | 0.5273     | 0.1095 to 0.9451    | **      | 0.0024           |
| D1:27°C vs. D1:30°C               | 0.3952     | -0.03297 to 0.8233  | ns      | 0.1025           |
| D1:27°C vs. D2:22°C               | -0.9109    | -1.339 to -0.4828   | ***     | <0.001           |
| D1:27°C vs. D2:27°C               | -0.4533    | -0.8915 to -0.01514 | *       | 0.0352           |
| D1:27°C vs. D2:30°C               | 0.38       | -0.04812 to 0.8081  | ns      | 0.1384           |
| D1:27°C vs. D3:22°C               | -1.796     | -2.224 to -1.368    | ***     | <0.001           |
| D1:27°C vs. D3:27°C               | -0.88      | -1.318 to -0.4418   | ***     | <0.001           |
| D1:27°C vs. D3:30°C               | 0.3709     | -0.05721 to 0.7990  | ns      | 0.1641           |

|                     |          |                     |     |         |
|---------------------|----------|---------------------|-----|---------|
| D1:27°C vs. D4:22°C | -2.714   | -3.142 to -2.286    | *** | <0.001  |
| D1:27°C vs. D4:27°C | -1.38    | -1.818 to -0.9418   | *** | <0.001  |
| D1:27°C vs. D4:30°C | 0.3679   | -0.06024 to 0.7960  | ns  | 0.1733  |
| D1:30°C vs. D2:22°C | -1.306   | -1.724 to -0.8883   | *** | <0.001  |
| D1:30°C vs. D2:27°C | -0.8485  | -1.277 to -0.4204   | *** | <0.001  |
| D1:30°C vs. D2:30°C | -0.01515 | -0.4330 to 0.4026   | ns  | >0.9999 |
| D1:30°C vs. D3:22°C | -2.191   | -2.609 to -1.773    | *** | <0.001  |
| D1:30°C vs. D3:27°C | -1.275   | -1.703 to -0.8470   | *** | <0.001  |
| D1:30°C vs. D3:30°C | -0.02424 | -0.4420 to 0.3936   | ns  | >0.9999 |
| D1:30°C vs. D4:22°C | -3.109   | -3.527 to -2.691    | *** | <0.001  |
| D1:30°C vs. D4:27°C | -1.775   | -2.203 to -1.347    | *** | <0.001  |
| D1:30°C vs. D4:30°C | -0.02727 | -0.4451 to 0.3905   | ns  | >0.9999 |
| D2:22°C vs. D2:27°C | 0.4576   | 0.02946 to 0.8857   | *   | 0.0245  |
| D2:22°C vs. D2:30°C | 1.291    | 0.8731 to 1.709     | *** | <0.001  |
| D2:22°C vs. D3:22°C | -0.8848  | -1.303 to -0.4670   | *** | <0.001  |
| D2:22°C vs. D3:27°C | 0.03091  | -0.3972 to 0.4590   | ns  | >0.9999 |
| D2:22°C vs. D3:30°C | 1.282    | 0.8640 to 1.700     | *** | <0.001  |
| D2:22°C vs. D4:22°C | -1.803   | -2.221 to -1.385    | *** | <0.001  |
| D2:22°C vs. D4:27°C | -0.4691  | -0.8972 to -0.04097 | *   | 0.0182  |
| D2:22°C vs. D4:30°C | 1.279    | 0.8610 to 1.697     | *** | <0.001  |
| D2:27°C vs. D2:30°C | 0.8333   | 0.4052 to 1.261     | *** | <0.001  |
| D2:27°C vs. D3:22°C | -1.342   | -1.771 to -0.9143   | *** | <0.001  |
| D2:27°C vs. D3:27°C | -0.4267  | -0.8649 to 0.01153  | ns  | 0.0645  |
| D2:27°C vs. D3:30°C | 0.8242   | 0.3961 to 1.252     | *** | <0.001  |
| D2:27°C vs. D4:22°C | -2.261   | -2.689 to -1.832    | *** | <0.001  |
| D2:27°C vs. D4:27°C | -0.9267  | -1.365 to -0.4885   | *** | <0.001  |
| D2:27°C vs. D4:30°C | 0.8212   | 0.3931 to 1.249     | *** | <0.001  |
| D2:30°C vs. D3:22°C | -2.176   | -2.594 to -1.758    | *** | <0.001  |
| D2:30°C vs. D3:27°C | -1.26    | -1.688 to -0.8319   | *** | <0.001  |
| D2:30°C vs. D3:30°C | -0.00909 | -0.4269 to 0.4087   | ns  | >0.9999 |
| D2:30°C vs. D4:22°C | -3.094   | -3.512 to -2.676    | *** | <0.001  |
| D2:30°C vs. D4:27°C | -1.76    | -2.188 to -1.332    | *** | <0.001  |
| D2:30°C vs. D4:30°C | -0.01212 | -0.4299 to 0.4057   | ns  | >0.9999 |
| D3:22°C vs. D3:27°C | 0.9158   | 0.4876 to 1.344     | *** | <0.001  |
| D3:22°C vs. D3:30°C | 2.167    | 1.749 to 2.584      | *** | <0.001  |
| D3:22°C vs. D4:22°C | -0.9182  | -1.336 to -0.5004   | *** | <0.001  |
| D3:22°C vs. D4:27°C | 0.4158   | -0.01236 to 0.8439  | ns  | 0.0661  |
| D3:22°C vs. D4:30°C | 2.164    | 1.746 to 2.581      | *** | <0.001  |
| D3:27°C vs. D3:30°C | 1.251    | 0.8228 to 1.679     | *** | <0.001  |
| D3:27°C vs. D4:22°C | -1.834   | -2.262 to -1.406    | *** | <0.001  |
| D3:27°C vs. D4:27°C | -0.5     | -0.9382 to -0.06181 | *   | 0.0108  |
| D3:27°C vs. D4:30°C | 1.248    | 0.8198 to 1.676     | *** | <0.001  |
| D3:30°C vs. D4:22°C | -3.085   | -3.503 to -2.667    | *** | <0.001  |
| D3:30°C vs. D4:27°C | -1.751   | -2.179 to -1.323    | *** | <0.001  |
| D3:30°C vs. D4:30°C | -0.00303 | -0.4208 to 0.4148   | ns  | >0.9999 |
| D4:22°C vs. D4:27°C | 1.334    | 0.9058 to 1.762     | *** | <0.001  |
| D4:22°C vs. D4:30°C | 3.082    | 2.664 to 3.500      | *** | <0.001  |
| D4:27°C vs. D4:30°C | 1.748    | 1.320 to 2.176      | *** | <0.001  |

**Supplemental Table 2.** Statistical analysis of *D. discoideum* AX2 fruiting body count on agar with a *K. aerogenes* lawn at various temperatures (Figure 3C). Fruiting body number was analyzed using a nonparametric GLMM after determining that residuals were not normally distributed. Random effects for replicate, plate number and colony number were included to control for nested dependencies within the experimental design. P values were calculated using a Tukey's multiple comparison test. ns, not significant; \*P<0.05; \*\*P<0.01; \*\*\*P < 0.001.

**Table 2a.** Random effects. Number of observations: 130. Groups: Replicate, 4; Plate number, 4; Colony number, 12. Dispersion parameter for nbinom2 family: 19.1

| Groups        | Name        | Variance | Standard deviation |
|---------------|-------------|----------|--------------------|
| Replicate     | (Intercept) | 0.1118   | 0.3344             |
| Plate number  | (Intercept) | 0.00507  | 0.07121            |
| Colony number | (Intercept) | 1.59E-10 | 1.26E-05           |

**Table 2b.** Conditional model after accounting for random factors replicate, plate number and colony number.

|               | Estimate | Standard error | z value | Summary | Pr(> z ) |
|---------------|----------|----------------|---------|---------|----------|
| (Intercept)   | 3.46028  | 0.18035        | 19.186  | ***     | < 2E-16  |
| 27°C          | -0.23015 | 0.07948        | -2.896  | **      | 0.00378  |
| 30°C          | -3.25419 | 0.16848        | -19.315 | ***     | < 2E-16  |
| 30°C Recovery | -0.74507 | 0.08357        | -8.915  | ***     | < 2E-16  |

**Table 2c.** Post hoc test after accounting for random factors replicate, plate number and colony number.

| Tukey's multiple comparisons test | Estimate | Standard error | z ratio | Summary | P value |
|-----------------------------------|----------|----------------|---------|---------|---------|
| 22°C vs. 27°C                     | 0.23     | 0.0795         | 2.896   | *       | 0.0198  |
| 22°C vs. 30°C                     | 3.254    | 0.168          | 19.315  | ***     | <0.0001 |
| 22°C vs. 30°C Recovery            | 0.745    | 0.0836         | 8.915   | ***     | <0.0001 |
| 27°C vs. 30°C                     | 3.024    | 0.17           | 17.802  | ***     | <0.0001 |
| 27°C vs. 30°C Recovery            | 0.515    | 0.0849         | 6.062   | ***     | <0.0001 |
| 30°C vs. 30°C Recovery            | -2.509   | 0.171          | -14.633 | ***     | <0.0001 |

**Supplemental Table 3.** Statistical analysis of *D. discoideum* AX2 spore yield on non-nutrient agar after growth at 27°C for various periods of time (Figure 4C). P values were calculated using mixed-effects ANOVA followed by Tukey's multiple comparison test. ns, not significant; \*P<0.05; \*\*P<0.01; \*\*\*P < 0.001.

| Tukey's multiple comparisons test | Mean diff. | 95.00% CI of diff. | Summary | Adjusted P value |
|-----------------------------------|------------|--------------------|---------|------------------|
| 22°C vs. 1                        | 0.1131     | -0.1012 to 0.3275  | ns      | 0.5868           |
| 22°C vs. 2                        | 0.2492     | 0.03488 to 0.4636  | *       | 0.0162           |
| 22°C vs. 3                        | 0.4083     | 0.1939 to 0.6226   | ***     | <0.001           |
| 22°C vs. 4                        | 0.5689     | 0.3546 to 0.7833   | ***     | <0.001           |
| 22°C vs. 5                        | 0.6958     | 0.4814 to 0.9101   | ***     | <0.001           |
| 1 vs. 2                           | 0.1361     | -0.07824 to 0.3505 | ns      | 0.3909           |
| 1 vs. 3                           | 0.2952     | 0.08081 to 0.5095  | **      | 0.0033           |
| 1 vs. 4                           | 0.4558     | 0.2414 to 0.6701   | ***     | <0.001           |
| 1 vs. 5                           | 0.5826     | 0.3683 to 0.7970   | ***     | <0.001           |
| 2 vs. 3                           | 0.1591     | -0.05530 to 0.3734 | ns      | 0.2349           |
| 2 vs. 4                           | 0.3197     | 0.1053 to 0.5340   | **      | 0.0014           |
| 2 vs. 5                           | 0.4465     | 0.2322 to 0.6609   | ***     | <0.001           |
| 3 vs. 4                           | 0.1606     | -0.05372 to 0.3750 | ns      | 0.2261           |
| 3 vs. 5                           | 0.2875     | 0.07313 to 0.5018  | **      | 0.0043           |
| 4 vs. 5                           | 0.1268     | -0.08750 to 0.3412 | ns      | 0.4667           |

**Supplemental Table 4.** Statistical analysis of the effects of a heatwave on expression of developmental marker genes. A beta regression approach was used to accommodate the bounded nature of the data due to min-max normalisation. A GLMM was fitted using the glmmTMB package in R, with gene type (early development, prestalk, prespore), temperature (22°C, 27°C) and their interaction as fixed effects. To account for variation across genes and experimental replicates, random intercepts for gene and replicate were included. Post hoc comparisons were performed using estimated marginal means (emmeans), and results were visualized using mean response plots with 95% confidence intervals. ns, not significant; \*P<0.05; \*\*P<0.01; \*\*\*P < 0.001.

**Table 4a.** Linear model analysis of reference gene expression based on plate number. Because samples were run in separate multiwell plates, each including one of the reference genes, either *gpdA* or *rnlA*, it was first verified that the plate number was not a significant predictor of reference gene expression level.

| Reference gene | Parameter   | Estimate | Standard error | t value | Summary | P value  |
|----------------|-------------|----------|----------------|---------|---------|----------|
| <i>gpdA</i>    | (Intercept) | 20.9543  | 0.4866         | 43.062  | **      | < 2E-16  |
| <i>gpdA</i>    | Plate       | 0.1021   | 0.2253         | 0.453   | ns      | 0.653    |
| <i>rnlA</i>    | (Intercept) | 16.6353  | 1.9095         | 8.712   | **      | 1.02E-09 |
| <i>rnlA</i>    | Plate       | -0.6711  | 0.4217         | -1.591  | ns      | 0.122    |

**Table 4b.** Conditional model. 22°C was used as the reference temperature and early development as the reference for development stage.

| Parameter      | Estimate | Standard error | Z value | Summary | Pr(> z ) |
|----------------|----------|----------------|---------|---------|----------|
| (Intercept)    | -0.1322  | 0.1391         | -0.95   | ns      | 0.34199  |
| Prespore       | -0.7299  | 0.2679         | -2.725  | **      | 0.00644  |
| Prestalk       | -0.3306  | 0.3621         | -0.913  | ns      | 0.36128  |
| 27°C           | -0.3832  | 0.1953         | -1.962  | *       | 0.04971  |
| Prespore: 27°C | -0.105   | 0.3665         | -0.286  | ns      | 0.77457  |
| Prestalk: 27°C | -0.4207  | 0.4918         | -0.856  | ns      | 0.39223  |

**Table 4c.** Post hoc comparisons. The data was analyzed to investigate the effects of temperature (22°C vs. 27°C) on expression levels of genes known to be active at different developmental stages using estimated marginal means.

| Gene Type         | Odds ratio | Standard error | df  | Z ratio | Summary | P value |
|-------------------|------------|----------------|-----|---------|---------|---------|
| Early development | 1.47       | 0.286          | Inf | 1.962   | *       | 0.0497  |
| Prespore          | 1.63       | 0.507          | Inf | 1.57    | ns      | 0.1165  |
| Prestalk          | 2.23       | 1.01           | Inf | 1.776   | ns      | 0.0757  |



**Supplemental Table 5.** Statistical analysis of *D. discoideum* group fitness of AX2 (A) and A6-Gal (G) grown at 22°C or 27°C and developed at 22°C either clonally or in chimeric mixes (Figure 7A). P values were calculated using mixed-effects ANOVA followed by Tukey's multiple comparison test. ns, not significant; \*P<0.05; \*\*P<0.01; \*\*\*P < 0.001.

| Tukey's multiple comparisons test | Mean diff. | 95.00% CI of diff.  | Summary | Adjusted P value |
|-----------------------------------|------------|---------------------|---------|------------------|
| A22°C vs. A27°C                   | 0.6117     | 0.4376 to 0.7857    | ***     | <0.001           |
| A22°C vs. G22°C                   | 0.4181     | 0.2440 to 0.5921    | ***     | <0.001           |
| A22°C vs. G27°C                   | 0.7228     | 0.5487 to 0.8969    | ***     | <0.001           |
| A22°C vs. A22°C+G22°C             | 0.09611    | -0.07797 to 0.2702  | ns      | 0.6681           |
| A22°C vs. A22°C+G27°C             | 0.3953     | 0.2212 to 0.5694    | ***     | <0.001           |
| A22°C vs. A27°C+G22°C             | 0.3597     | 0.1856 to 0.5338    | ***     | <0.001           |
| A22°C vs. A27°C+G27°C             | 0.6117     | 0.4376 to 0.7857    | ***     | <0.001           |
| A27°C vs. G22°C                   | -0.1936    | -0.3677 to -0.01953 | *       | 0.019            |
| A27°C vs. G27°C                   | 0.1111     | -0.06297 to 0.2852  | ns      | 0.49             |
| A27°C vs. A22°C+G22°C             | -0.5156    | -0.6896 to -0.3415  | ***     | <0.001           |
| A27°C vs. A22°C+G27°C             | -0.2164    | -0.3905 to -0.04231 | **      | 0.0055           |
| A27°C vs. A27°C+G22°C             | -0.2519    | -0.4260 to -0.07786 | ***     | 0.0007           |
| A27°C vs. A27°C+G27°C             | 0          | -0.1741 to 0.1741   | ns      | >0.9999          |
| G22°C vs. G27°C                   | 0.3047     | 0.1306 to 0.4788    | ***     | <0.001           |
| G22°C vs. A22°C+G22°C             | -0.3219    | -0.4960 to -0.1479  | ***     | <0.001           |
| G22°C vs. A22°C+G27°C             | -0.02278   | -0.1969 to 0.1513   | ns      | >0.9999          |
| G22°C vs. A27°C+G22°C             | -0.05833   | -0.2324 to 0.1157   | ns      | 0.9645           |
| G22°C vs. A27°C+G27°C             | 0.1936     | 0.01953 to 0.3677   | *       | 0.019            |
| G27°C vs. A22°C+G22°C             | -0.6267    | -0.8007 to -0.4526  | ***     | <0.001           |
| G27°C vs. A22°C+G27°C             | -0.3275    | -0.5016 to -0.1534  | ***     | <0.001           |
| G27°C vs. A27°C+G22°C             | -0.3631    | -0.5371 to -0.1890  | ***     | <0.001           |
| G27°C vs. A27°C+G27°C             | -0.1111    | -0.2852 to 0.06297  | ns      | 0.49             |
| A22°C+G22°C vs. A22°C+G27°C       | 0.2992     | 0.1251 to 0.4732    | ***     | <0.001           |
| A22°C+G22°C vs. A27°C+G22°C       | 0.2636     | 0.08953 to 0.4377   | ***     | 0.0003           |
| A22°C+G22°C vs. A27°C+G27°C       | 0.5156     | 0.3415 to 0.6896    | ***     | <0.001           |
| A22°C+G27°C vs. A27°C+G22°C       | -0.03556   | -0.2096 to 0.1385   | ns      | 0.9981           |
| A22°C+G27°C vs. A27°C+G27°C       | 0.2164     | 0.04231 to 0.3905   | **      | 0.0055           |
| A27°C+G22°C vs. A27°C+G27°C       | 0.2519     | 0.07786 to 0.4260   | ***     | 0.0007           |

**Supplemental Table 6.** Statistical analysis of *D. discoideum* strain fitness in chimera mixes. Strain fitness was calculated for the AX2 (A) non-labeled strain and the A6-Gal (G) labeled strain (Figure 7B). P values were calculated using mixed-effects ANOVA followed by Sidak's multiple comparison test. ns, not significant; \*\*P<0.01; \*\*\*P < 0.001.

| Sidak's multiple comparisons test                                                         | Mean diff. | 95.00% CI of diff.  | Summary | Adjusted P value |
|-------------------------------------------------------------------------------------------|------------|---------------------|---------|------------------|
| A22°C+G22°C:Fitness of labelled strain vs. A22°C+G22°C:Fitness of non labelled strain     | -1.027     | -1.259 to -0.7952   | ***     | <0.001           |
| A22°C+G22°C:Fitness of labelled strain vs. A27°C+G27°C:Fitness of labelled strain         | 0.2804     | 0.04828 to 0.5126   | **      | 0.0059           |
| A22°C+G22°C:Fitness of labelled strain vs. A27°C+G27°C:Fitness of non labelled strain     | -0.2778    | -0.5099 to -0.04562 | **      | 0.0067           |
| A22°C+G22°C:Fitness of labelled strain vs. A22°C+G27°C:Fitness of labelled strain         | 0.3196     | 0.08740 to 0.5517   | ***     | 0.0009           |
| A22°C+G22°C:Fitness of labelled strain vs. A22°C+G27°C:Fitness of non labelled strain     | -0.7486    | -0.9807 to -0.5164  | ***     | <0.001           |
| A22°C+G22°C:Fitness of labelled strain vs. A27°C+G22°C:Fitness of labelled strain         | -0.809     | -1.041 to -0.5768   | ***     | <0.001           |
| A22°C+G22°C:Fitness of labelled strain vs. A27°C+G22°C:Fitness of non labelled strain     | 0.3083     | 0.07617 to 0.5405   | **      | 0.0016           |
| A22°C+G22°C:Fitness of non labelled strain vs. A27°C+G27°C:Fitness of labelled strain     | 1.308      | 1.076 to 1.540      | ***     | <0.001           |
| A22°C+G22°C:Fitness of non labelled strain vs. A27°C+G27°C:Fitness of non labelled strain | 0.7496     | 0.5174 to 0.9817    | ***     | <0.001           |
| A22°C+G22°C:Fitness of non labelled strain vs. A22°C+G27°C:Fitness of labelled strain     | 1.347      | 1.115 to 1.579      | ***     | <0.001           |
| A22°C+G22°C:Fitness of non labelled strain vs. A22°C+G27°C:Fitness of non labelled strain | 0.2788     | 0.04662 to 0.5109   | **      | 0.0064           |
| A22°C+G22°C:Fitness of non labelled strain vs. A27°C+G22°C:Fitness of labelled strain     | 0.2183     | -0.01383 to 0.4505  | ns      | 0.0871           |
| A22°C+G22°C:Fitness of non labelled strain vs. A27°C+G22°C:Fitness of non labelled strain | 1.336      | 1.104 to 1.568      | ***     | <0.001           |
| A27°C+G27°C:Fitness of labelled strain vs. A27°C+G27°C:Fitness of non labelled strain     | -0.5582    | -0.7904 to -0.3261  | ***     | <0.001           |
| A27°C+G27°C:Fitness of labelled strain vs. A22°C+G27°C:Fitness of labelled strain         | 0.03911    | -0.1930 to 0.2713   | ns      | >0.9999          |
| A27°C+G27°C:Fitness of labelled strain vs. A22°C+G27°C:Fitness of non labelled strain     | -1.029     | -1.261 to -0.7968   | ***     | <0.001           |

|                                                                                           |          |                    |     |         |
|-------------------------------------------------------------------------------------------|----------|--------------------|-----|---------|
| A27°C+G27°C:Fitness of labelled strain vs. A27°C+G22°C:Fitness of labelled strain         | -1.089   | -1.322 to -0.8573  | *** | <0.001  |
| A27°C+G27°C:Fitness of labelled strain vs. A27°C+G22°C:Fitness of non labelled strain     | 0.02789  | -0.2043 to 0.2600  | ns  | >0.9999 |
| A27°C+G27°C:Fitness of non labelled strain vs. A22°C+G27°C:Fitness of labelled strain     | 0.5973   | 0.3652 to 0.8295   | *** | <0.001  |
| A27°C+G27°C:Fitness of non labelled strain vs. A22°C+G27°C:Fitness of non labelled strain | -0.4708  | -0.7029 to -0.2386 | *** | <0.001  |
| A27°C+G27°C:Fitness of non labelled strain vs. A27°C+G22°C:Fitness of labelled strain     | -0.5312  | -0.7634 to -0.2991 | *** | <0.001  |
| A27°C+G27°C:Fitness of non labelled strain vs. A27°C+G22°C:Fitness of non labelled strain | 0.5861   | 0.3540 to 0.8183   | *** | <0.001  |
| A22°C+G27°C:Fitness of labelled strain vs. A22°C+G27°C:Fitness of non labelled strain     | -1.068   | -1.300 to -0.8360  | *** | <0.001  |
| A22°C+G27°C:Fitness of labelled strain vs. A27°C+G22°C:Fitness of labelled strain         | -1.129   | -1.361 to -0.8964  | *** | <0.001  |
| A22°C+G27°C:Fitness of labelled strain vs. A27°C+G22°C:Fitness of non labelled strain     | -0.01122 | -0.2434 to 0.2209  | ns  | >0.9999 |
| A22°C+G27°C:Fitness of non labelled strain vs. A27°C+G22°C:Fitness of labelled strain     | -0.06044 | -0.2926 to 0.1717  | ns  | >0.9999 |
| A22°C+G27°C:Fitness of non labelled strain vs. A27°C+G22°C:Fitness of non labelled strain | 1.057    | 0.8247 to 1.289    | *** | <0.001  |
| A27°C+G22°C:Fitness of labelled strain vs. A27°C+G22°C:Fitness of non labelled strain     | 1.117    | 0.8852 to 1.349    | *** | <0.001  |

**Supplemental Table 7.** Statistical analysis of *D. discoideum* relative within-group fitness of the A6-Gal (G) strain in chimeric mixes with AX2 (A) (Figure 7C). P values were calculated using mixed-effects ANOVA followed by Tukey's multiple comparison test. ns, not significant; \*\*P<0.01; \*\*\*P < 0.001.

| Tukey's multiple comparisons test | Mean diff. | 95.00% CI of diff. | Summary | Adjusted P value |
|-----------------------------------|------------|--------------------|---------|------------------|
| A22°C+G22°C vs. A27°C+G27°C       | 0.1121     | -0.03578 to 0.2599 | ns      | 0.1902           |
| A22°C+G22°C vs. A22°C+G27°C       | 0.3194     | 0.1716 to 0.4673   | ***     | <0.001           |
| A22°C+G22°C vs. A27°C+G22°C       | -1.456     | -1.604 to -1.308   | ***     | <0.001           |
| A27°C+G27°C vs. A22°C+G27°C       | 0.2074     | 0.05951 to 0.3552  | **      | 0.0033           |
| A27°C+G27°C vs. A27°C+G22°C       | -1.568     | -1.716 to -1.420   | ***     | <0.001           |
| A22°C+G27°C vs. A27°C+G22°C       | -1.775     | -1.923 to -1.628   | ***     | <0.001           |
